# Supplementary material
Source: publisher figshare collection journal article supplement (https://acs.figshare.com/ndownloader/files/4592659)
Supplement: Supplementary file 1 [file 4592659]

#\#CIF_1.1
 
#  CIF produced by WinGX routine CIF_UPDATE
#  Created on 2008-04-11 at 14:44:34
#  Using CIFtbx version 2.6.2 16 Jun 1998
 
#  Dictionary name : cif_core.dic
#  Dictionary vers : 2.3
#  Request file    : f:\programs\wingx\files\cifdoc.dat
#  CIF files read  : ines15 dreduc psi_scan struct
 
#------------------ SECTION 1. GLOBAL INFORMATION ---------------------------#
 
data_global
 
#------------------ AUDIT DETAILS -------------------------------------------#
 
_audit_creation_date            2008-04-11
_audit_creation_method          'WinGX routine CIF_UPDATE'
_audit_conform_dict_name        cif_core.dic
_audit_conform_dict_version     2.3
_audit_conform_dict_location    ftp://ftp.iucr.org/pub/cif_core.dic
_audit_update_record            ?
 
#------------------ SUBMISSION DETAILS --------------------------------------#
 
# Name and address of author for correspondence
 
_publ_contact_author_name       'Kre\<simir Mol\'canov'
_publ_contact_author_address
;
 Rudjer Bo\<skovi\'c Institute
 P.O. Box 180
 HR-10002 Zagreb
 Croatia
;
 
_publ_contact_author_email      kmolcano@irb.hr
_publ_contact_author_fax        '++ 385 1 4680245'
_publ_contact_author_phone      '++ 385 1 4571203'
_publ_requested_journal         'Journal of Organic Chemistry'
_publ_requested_category        FO
_publ_requested_coeditor_name   ?
 
_publ_contact_letter
;
May 15, 2008
 
Please consider this CIF submission for publication in
Journal of Organic Chemistry.  All authors have seen 
and approved of this submission.
 
Kresimir Molcanov
;
 
#------------------ PROCESSING SUMMARY (JOURNAL OFFICE ONLY) ----------------#
 
_journal_date_recd_electronic    ?
_journal_date_to_coeditor        ?
_journal_date_from_coeditor      ?
_journal_date_accepted           ?
_journal_date_printers_first     ?
_journal_date_printers_final     ?
_journal_date_proofs_out         ?
_journal_date_proofs_in          ?
_journal_coeditor_name           ?
_journal_coeditor_code           ?
_journal_coeditor_notes          ?
_journal_techeditor_code         ?
_journal_techeditor_notes        ?
_journal_coden_ASTM              ?
_journal_name_full               ?
_journal_year                    ?
_journal_volume                  ?
_journal_issue                   ?
_journal_page_first              ?
_journal_page_last               ?
_journal_suppl_publ_number       ?
_journal_suppl_publ_pages        ?
 
#------------------ TITLE AND AUTHOR LIST------------------------------------#
 
_publ_section_title
;
 ?
;
 
_publ_section_title_footnote
;
?
;
 
loop_
_publ_author_name
_publ_author_address
      'Ines Vujasinovi\'c'
;      Rudjer Bo\<skovi\'c Institute
       P.O. Box 180
       HR-10002 Zagreb
       Croatia
;
     'Jelena Veljkovi\'c'
;      Rudjer Bo\<skovi\'c Institute
       P.O. Box 180
       HR-10002 Zagreb
       Croatia
;
     'Kata Mlinari\'c-Majerski'
;      Rudjer Bo\<skovi\'c Institute
       P.O. Box 180
       HR-10002 Zagreb
       Croatia
;
     'Kre\<simir Mol\<canov'
;      Rudjer Bo\<skovi\'c Institute
       P.O. Box 180
       HR-10002 Zagreb
       Croatia
;
	'Biserka Koji\'c-Prodi\'c'
;      Rudjer Bo\<skovi\'c Institute
       P.O. Box 180
       HR-10002 Zagreb
       Croatia
;
 
#------------------ TEXT ----------------------------------------------------#
 
_publ_section_synopsis
;
# Insert blank lines between paragraphs
?
;
_publ_section_abstract
;
# Insert blank lines between paragraphs
 ?
;
 
_publ_section_comment
;
# Insert blank lines between paragraphs
 ?
;
 
_publ_section_exptl_prep
;
 ?
;
 
_publ_section_exptl_refinement
;
 ?
;
 
# Insert blank lines between references
 
_publ_section_references
;
 Allen, F.H., Kennard, O. & Taylor, R. (1983).
   Acc. Chem. Res.  16, 146-153.
 
 Altomare, A., Cascarano, G., Giacovazzo, C. & Guagliardi, A.
   (1993) J. Appl. Cryst. 26, 343-350.
 
 Altomare, A. Burla, M. C., Camalli, M., Cascarano, G. L.,
 Giacovazzo, C., Guagliardi, A., Moliterni, A. G. G., Polidori, G.
 & Spagna, R. (1999) J. Appl. Cryst. 32, 115-119.
 
 Blessing, R. H. (1995) Acta Cryst., A51, 33-38.
 
 Blessing, R. H. (1987) Cryst. Rev. 1, 3-58.
 
 Blessing, R. H. (1989) J. Appl. Cryst. 22, 396-397.
 
 Beurskens, P.T., Beurskens, G., de Gelder, R.,
   Garci\'ia-Granda, S., Gould, R.O., Israel, R. & Smits, J.M.M.
   (1999) The DIRDIF-99 program system,
   Technical Report of the Crystallography Laboratory,
   University of Nijmegen, The Netherlands.
 
 Cremer, D. & Pople, J.A. (1975). J. Am. Chem. Soc. 97, 1354-1358.
 
 Enraf-Nonius (1994). CAD4Express Software. Enraf-Nonius, Delft,
   The Netherlands.
 
 Farrugia, L. J. (1997) ORTEP-3 for Windows, J. Appl. Cryst. 30, 565.
 
 Farrugia, L. J. (1999) WinGX, J. Appl. Cryst. 32, 837-838.
 
 Flack, H.D. (1983). Acta Cryst. A39, 876-881.
 
 Harms, K. & Wocadlo, S. (1995) XCAD-4. Program for Processing CAD-4
 Diffractometer Data. University of Marburg, Germany.
 
 Johnson, C.K. (1965). ORTEP. Report ORNL-3794. Oak Ridge National
 Laboratory, Tennessee, USA.
 
 Lehman, M. S. and Larsen, F. K. (1974) Acta. Cryst. A30, 580
 
 LePage, Y. (1987). J. Appl. Cryst. 20, 264-269.
 
 North, A. C. T., Phillips, D. C. & Mathews, F. S. (1968) Acta Cryst,
 A24, 351-359
 
 Orpen, A. G., Brammer, L., Allen, F. H., Kennard, O., Watson, D. G.,
 & Taylor, R. (1992). International Tables for Crystallography,
 Volume C.
 
 Sheldrick, G.M. (1993) SHELXL93. Program for crystal structure
   refinement. University of G\"ottingen, Germany.
 
 Sheldrick, G.M. (1997) SHELXL97. Program for crystal structure
   refinement. University of G\"ottingen, Germany.
 
 Sheldrick, G.M. (1985). SHELXS86. In Crystallographic Computing 3,
 edited by G. M. Sheldrick, C. Kruger & R. Goddard, pp. 175-189.
 Oxford University Press.
 
 Sheldrick, G.M. (1997) SHELXS97. Program for Crystal Structure solution.
   University of G\"ottingen, Germany.
 
 Spek, A.L. (1990). Acta Cryst. A46, C34
 
 Streltsov, V. A. & Zavodnik, V. E. (1989) Sov. Phys. Crystallogr.
 34, 824-828
 
 Streltsov, V. A. & Zavodnik, V. E. (1990) Sov. Phys. Crystallogr.
 35, 281.
 
 Walker, N. &  Stuart, D. (1983). Acta Cryst., A39, 158 - 166.
 
 Wilson, A.J.C. (1992) Ed. International Tables for Crystallography,
   Volume C, Kluwer Academic Publishers, Dordrecht, The Netherlands.
;
_publ_section_figure_captions
;
 Figure 1. View of (I) (50% probability displacement ellipsoids)
;
_publ_section_acknowledgements
;
 ?
;
_publ_section_table_legends
;
Table 1. Fractional atomic coordinates and equivalent
         isotropic displacement parameters (\%A^2^)
 
Table 2. Selected geometric parameters (\%A ,\% )
;
 
#------------------  SECTION 2. COMPOUND(S) DETAILS -------------------------#
 
data_ines15
 
_audit_creation_date                    2008-04-11T14:44:34-00:00
_audit_creation_method                  'WinGX routine CIF_UPDATE'
 
#------------------ CHEMICAL INFORMATION ------------------------------------#
 
_chemical_formula_moiety                'C14 H20 O4 S4'
_chemical_formula_sum                   'C14 H20 O4 S4'
_chemical_formula_weight                380.57
 
#------------------ UNIT CELL INFORMATION -----------------------------------#
 
_symmetry_cell_setting                  monoclinic
_symmetry_space_group_name_H-M          'P 21/a'
loop_
    _symmetry_equiv_pos_as_xyz
'x, y, z'
'-x+1/2, y+1/2, -z'
'-x, -y, -z'
'x-1/2, -y-1/2, z'
 
_cell_length_a                          9.393(6)
_cell_length_b                          9.113(8)
_cell_length_c                          10.616(3)
_cell_angle_alpha                       90
_cell_angle_beta                        105.78(4)
_cell_angle_gamma                       90
_cell_volume                            874.5(10)
_cell_formula_units_Z                   2
_cell_measurement_temperature           293(2)
_cell_measurement_reflns_used           19
_cell_measurement_theta_min             6.5
_cell_measurement_theta_max             17.5
 
#------------------ CRYSTAL INFORMATION -------------------------------------#
 
_exptl_crystal_description              prism
_exptl_crystal_colour                   colourless
_exptl_crystal_size_max                 0.25
_exptl_crystal_size_mid                 0.18
_exptl_crystal_size_min                 0.12
_exptl_crystal_density_diffrn           1.445
_exptl_crystal_density_method           'not measured'
_exptl_crystal_F_000                    400
_exptl_absorpt_coefficient_mu           5.116
_exptl_absorpt_correction_type          psi-scan
_exptl_absorpt_correction_T_min         0.4003
_exptl_absorpt_correction_T_max         0.5401
 
#------------------ DATA COLLECTION INFORMATION -----------------------------#
 
_diffrn_radiation_wavelength            1.54179
_diffrn_radiation_type                  CuK\a
_diffrn_radiation_probe                 x-ray
_diffrn_measurement_device_type         'Enraf Nonius CAD4'
_diffrn_measurement_device              '\k-geometry diffractometer'
_diffrn_measurement_method              'non-profiled omega/2theta scans'
_diffrn_standards_number                3
_diffrn_standards_interval_time         120
_diffrn_standards_decay_%               1
loop_
    _diffrn_standard_refln_index_h
    _diffrn_standard_refln_index_k
    _diffrn_standard_refln_index_l
2 -3 3
1 2 3
3 -2 2
 
_diffrn_reflns_number                   1954
_diffrn_reflns_av_R_equivalents         0.0208
_diffrn_reflns_limit_h_min              0
_diffrn_reflns_limit_h_max              11
_diffrn_reflns_limit_k_min              0
_diffrn_reflns_limit_k_max              11
_diffrn_reflns_limit_l_min              -13
_diffrn_reflns_limit_l_max              12
_diffrn_reflns_theta_min                4.33
_diffrn_reflns_theta_max                76.66
_diffrn_reflns_theta_full               76.66
_diffrn_measured_fraction_theta_max
                                        0.997
_diffrn_measured_fraction_theta_full
                                        0.997
_reflns_number_total                    1837
_reflns_number_gt                       1590
_reflns_threshold_expression            >2sigma(I)
 
#------------------ COMPUTER PROGRAMS USED ----------------------------------#
 
_computing_data_collection              'CAD4 Express (Enraf Nonius, 1994)'
_computing_cell_refinement              'CAD4 Express (Enraf Nonius, 1994)'
_computing_data_reduction               'XCAD4 (Harms & Wocadlo, 1995)'
_computing_structure_solution           'SHELXS-97 (Sheldrick, 1997)'
_computing_structure_refinement         'SHELXL-97 (Sheldrick, 1997)'
_computing_molecular_graphics           'Ortep-3 for Windows (Farrugia, 1997)'
_computing_publication_material
                                   'WinGX publication routines (Farrugia, 1999)'
 
#------------------ REFINEMENT INFORMATION ----------------------------------#
 
_refine_ls_structure_factor_coef        Fsqd
_refine_ls_matrix_type                  full
_refine_ls_weighting_scheme             calc
_refine_ls_weighting_details
         'calc w=1/[\s^2^(Fo^2^)+(0.0480P)^2^+0.2562P] where P=(Fo^2^+2Fc^2^)/3'
_refine_ls_hydrogen_treatment           refall
_refine_ls_extinction_method            SHELXL
_refine_ls_extinction_expression
                                    Fc^*^=kFc[1+0.001xFc^2^\l^3^/sin(2\q)]^-1/4^
_refine_ls_extinction_coef              0.0063(7)
_refine_ls_number_reflns                1837
_refine_ls_number_parameters            141
_refine_ls_number_restraints            0
_refine_ls_R_factor_gt                  0.0341
_refine_ls_wR_factor_ref                0.0923
_refine_ls_goodness_of_fit_ref          1.034
_refine_ls_restrained_S_all             1.034
_refine_ls_shift/su_max                 0
_refine_diff_density_max                0.266
_refine_diff_density_min                -0.255
 
#------------------ ATOMIC TYPES, COORDINATES AND THERMAL PARAMETERS --------#
 
loop_
    _atom_type_symbol
    _atom_type_description
    _atom_type_scat_dispersion_real
    _atom_type_scat_dispersion_imag
    _atom_type_scat_source
C C 0.018 0.009 'International Tables Vol C Tables 4.2.6.8 and 6.1.1.4'
H H 0 0 'International Tables Vol C Tables 4.2.6.8 and 6.1.1.4'
S S 0.333 0.557 'International Tables Vol C Tables 4.2.6.8 and 6.1.1.4'
O O 0.049 0.032 'International Tables Vol C Tables 4.2.6.8 and 6.1.1.4'
 
loop_
    _atom_site_label
    _atom_site_type_symbol
    _atom_site_fract_x
    _atom_site_fract_y
    _atom_site_fract_z
    _atom_site_U_iso_or_equiv
    _atom_site_adp_type
    _atom_site_occupancy
    _atom_site_calc_flag
    _atom_site_refinement_flags
    _atom_site_disorder_group
    _atom_site_disorder_assembly
C6 C 0.3529(2) 0.3218(3) 0.3752(2) 0.0579(5) Uani 1 d . . .
C7 C 0.2774(3) 0.4210(3) 0.45198(19) 0.0598(6) Uani 1 d . . .
S2 S 0.22870(7) 0.19207(6) 0.27268(5) 0.0599(2) Uani 1 d . . .
S1 S -0.12546(5) 0.47264(6) -0.35299(5) 0.05458(19) Uani 1 d . . .
O2 O 0.25850(15) 0.38667(16) 0.09840(13) 0.0536(4) Uani 1 d . . .
O1 O -0.35687(16) 0.32951(18) -0.32677(15) 0.0632(4) Uani 1 d . . .
C4 C 0.0804(2) 0.1995(2) 0.01146(19) 0.0460(4) Uani 1 d . . .
C2 C -0.1280(2) 0.2329(2) -0.19414(19) 0.0464(4) Uani 1 d . . .
C3 C -0.0153(2) 0.3080(2) -0.08220(19) 0.0462(4) Uani 1 d . . .
C5 C 0.19531(19) 0.2773(2) 0.11731(17) 0.0419(4) Uani 1 d . . .
C1 C -0.2239(2) 0.3376(2) -0.29103(17) 0.0452(4) Uani 1 d . . .
H4A H 0.020(3) 0.141(3) 0.049(2) 0.057(6) Uiso 1 d . . .
H7A H 0.234(3) 0.365(3) 0.507(3) 0.073(7) Uiso 1 d . . .
H2A H -0.194(3) 0.172(2) -0.162(2) 0.055(6) Uiso 1 d . . .
H2B H -0.079(2) 0.176(2) -0.242(2) 0.056(6) Uiso 1 d . . .
H3B H -0.066(2) 0.367(3) -0.033(2) 0.057(6) Uiso 1 d . . .
H6B H 0.395(2) 0.377(3) 0.320(2) 0.053(6) Uiso 1 d . . .
H3A H 0.044(3) 0.369(3) -0.113(2) 0.065(7) Uiso 1 d . . .
H4B H 0.131(3) 0.136(3) -0.035(2) 0.065(7) Uiso 1 d . . .
H6A H 0.425(3) 0.268(3) 0.432(3) 0.072(7) Uiso 1 d . . .
H7B H 0.350(3) 0.488(3) 0.502(3) 0.080(8) Uiso 1 d . . .
 
loop_
    _atom_site_aniso_label
    _atom_site_aniso_U_11
    _atom_site_aniso_U_22
    _atom_site_aniso_U_33
    _atom_site_aniso_U_23
    _atom_site_aniso_U_13
    _atom_site_aniso_U_12
C6 0.0504(11) 0.0679(14) 0.0457(10) 0.0095(10) -0.0037(9) 0.0007(10)
C7 0.0619(13) 0.0770(15) 0.0349(9) 0.0078(10) 0.0036(9) -0.0053(11)
S2 0.0713(4) 0.0538(3) 0.0475(3) 0.0120(2) 0.0042(2) -0.0061(2)
S1 0.0484(3) 0.0676(3) 0.0491(3) 0.0064(2) 0.0156(2) -0.0035(2)
O2 0.0557(8) 0.0600(8) 0.0434(7) 0.0023(6) 0.0106(6) -0.0141(7)
O1 0.0441(7) 0.0780(11) 0.0606(9) 0.0005(7) 0.0026(7) -0.0120(7)
C4 0.0497(10) 0.0419(10) 0.0447(9) -0.0032(8) 0.0098(8) -0.0012(8)
C2 0.0474(10) 0.0461(10) 0.0438(9) -0.0079(8) 0.0089(8) -0.0051(8)
C3 0.0480(10) 0.0427(9) 0.0430(9) -0.0059(8) 0.0040(8) -0.0017(8)
C5 0.0410(9) 0.0436(9) 0.0410(9) 0.0015(7) 0.0109(7) 0.0028(7)
C1 0.0460(10) 0.0547(11) 0.0342(8) -0.0100(7) 0.0097(7) -0.0065(8)
 
 
#------------------ MOLECULAR GEOMETRY --------------------------------------#
 
_geom_special_details
;
 All esds (except the esd in the dihedral angle between two l.s. planes)
 are estimated using the full covariance matrix.  The cell esds are taken
 into account individually in the estimation of esds in distances, angles
 and torsion angles; correlations between esds in cell parameters are only
 used when they are defined by crystal symmetry.  An approximate (isotropic)
 treatment of cell esds is used for estimating esds involving l.s. planes.
;
loop_
    _geom_bond_atom_site_label_1
    _geom_bond_atom_site_label_2
    _geom_bond_distance
    _geom_bond_site_symmetry_2
    _geom_bond_publ_flag
C6 C7 1.517(3) . ?
C6 S2 1.803(2) . ?
C6 H6B 0.94(2) . ?
C6 H6A 0.92(3) . ?
C7 S1 1.807(3) 3_565 ?
C7 H7A 0.94(3) . ?
C7 H7B 0.97(3) . ?
S2 C5 1.7722(19) . ?
S1 C1 1.770(2) . ?
S1 C7 1.807(3) 3_565 ?
O2 C5 1.205(2) . ?
O1 C1 1.205(2) . ?
C4 C5 1.507(3) . ?
C4 C3 1.513(3) . ?
C4 H4A 0.94(2) . ?
C4 H4B 0.97(3) . ?
C2 C1 1.508(3) . ?
C2 C3 1.522(3) . ?
C2 H2A 0.96(2) . ?
C2 H2B 0.93(2) . ?
C3 H3B 0.96(2) . ?
C3 H3A 0.90(3) . ?
 
loop_
    _geom_angle_atom_site_label_1
    _geom_angle_atom_site_label_2
    _geom_angle_atom_site_label_3
    _geom_angle
    _geom_angle_site_symmetry_1
    _geom_angle_site_symmetry_3
    _geom_angle_publ_flag
C7 C6 S2 113.24(17) . . ?
C7 C6 H6B 110.7(14) . . ?
S2 C6 H6B 106.5(13) . . ?
C7 C6 H6A 109.7(16) . . ?
S2 C6 H6A 106.4(17) . . ?
H6B C6 H6A 110(2) . . ?
C6 C7 S1 114.71(14) . 3_565 ?
C6 C7 H7A 110.6(16) . . ?
S1 C7 H7A 104.2(16) 3_565 . ?
C6 C7 H7B 108.2(16) . . ?
S1 C7 H7B 108.0(16) 3_565 . ?
H7A C7 H7B 111(2) . . ?
C5 S2 C6 101.30(11) . . ?
C1 S1 C7 100.33(12) . 3_565 ?
C5 C4 C3 111.08(16) . . ?
C5 C4 H4A 109.9(14) . . ?
C3 C4 H4A 109.1(14) . . ?
C5 C4 H4B 108.0(14) . . ?
C3 C4 H4B 110.0(14) . . ?
H4A C4 H4B 109(2) . . ?
C1 C2 C3 114.02(17) . . ?
C1 C2 H2A 106.4(13) . . ?
C3 C2 H2A 111.3(13) . . ?
C1 C2 H2B 105.5(14) . . ?
C3 C2 H2B 109.7(14) . . ?
H2A C2 H2B 109.7(19) . . ?
C4 C3 C2 112.46(17) . . ?
C4 C3 H3B 107.7(14) . . ?
C2 C3 H3B 109.3(13) . . ?
C4 C3 H3A 108.9(15) . . ?
C2 C3 H3A 111.2(16) . . ?
H3B C3 H3A 107(2) . . ?
O2 C5 C4 123.41(16) . . ?
O2 C5 S2 123.18(14) . . ?
C4 C5 S2 113.41(14) . . ?
O1 C1 C2 123.44(19) . . ?
O1 C1 S1 121.80(16) . . ?
C2 C1 S1 114.73(14) . . ?
 
